# Supplementary material for: Orientational order-dependent thermal expansion and compressibility of ZrW2O8 and ZrMo2O8
Source: Royal Society of Chemistry journal article supplement (doi:10.1039/c3cp52876f), 2013-01-01
Supplement: c3cp52876f.pdf [file c3cp52876f.pdf]

# Orientalional Order-Dependent Thermal Expansion and Compressibility of $ZrW_2O_8$ and $ZrMo_2O_8$ : Supplemental Material

Leighanne C. Gallington, Karena W. Chapman, Cody R. Morelock, Peter J. Chupas, and Angus P. Wilkinson

## List of Figures

|    |                                                           |   |
|----|-----------------------------------------------------------|---|
| 1  | Comparison of the MK3BRIM and MK2BRIM . . . . .           | 2 |
| 2  | Rietveld fit, $ZrW_2O_8$ , 430K, MK2BRIM . . . . .        | 3 |
| 3  | Rietveld fit, $ZrW_2O_8$ , 386K, MK3BRIM . . . . .        | 3 |
| 4  | XRD stackplot, $ZrW_2O_8$ , MK3BRIM . . . . .             | 3 |
| 5  | XRD stackplot, $ZrW_2O_8$ , MK2BRIM . . . . .             | 4 |
| 6  | XRD stackplot, $ZrW_2O_8$ , MK2BRIM (cont'd) . . . . .    | 5 |
| 7  | XRD stackplot, $ZrMo_2O_8$ , MK2BRIM . . . . .            | 6 |
| 8  | Phase transition rates . . . . .                          | 7 |
| 9  | Relative linear thermal expansion of $ZrW_2O_8$ . . . . . | 7 |
| 10 | $ZrW_2O_8$ CTEs . . . . .                                 | 7 |

## List of Tables

|   |                                                                                 |    |
|---|---------------------------------------------------------------------------------|----|
| 1 | BRIM temperature calibration . . . . .                                          | 2  |
| 2 | $ZrW_2O_8$ bulk moduli . . . . .                                                | 7  |
| 3 | $ZrMo_2O_8$ bulk moduli, MK2BRIM . . . . .                                      | 7  |
| 4 | $ZrW_2O_8$ lattice constants, MK2BRIM, $P2_13$ and $Pa\bar{3}$ models . . . . . | 9  |
| 5 | $ZrW_2O_8$ lattice constants, MK2BRIM, $P2_12_12_1$ model . . . . .             | 11 |
| 6 | $ZrW_2O_8$ lattice constants, MK3BRIM, $P2_13$ and $Pa\bar{3}$ models . . . . . | 11 |
| 7 | $ZrMo_2O_8$ lattice constants, MK2BRIM, $Pa\bar{3}$ model . . . . .             | 12 |

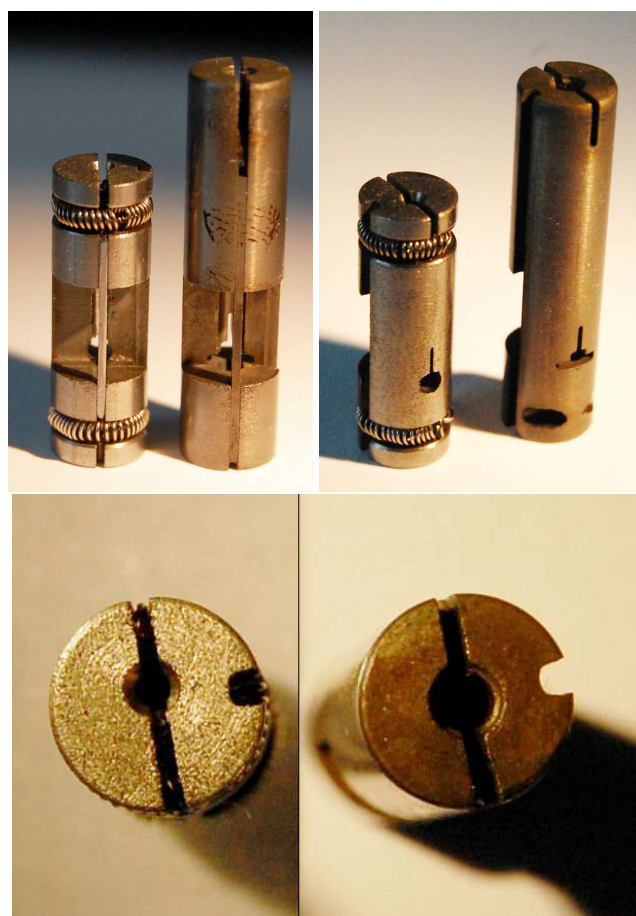

**Sup. Fig. 1** Comparison of the MK3BRIM and MK2BRIM. Views from the beam stop blade side (upper left panel), beam entrance slits side (upper right panel), and top (lower panel). The top view shows the sample tube holes, side slot that allows easy flow of the pressure transmitting fluid past the BRIM, and a slot across the top that enables rotation of the BRIM in the pressure vessel bore during initial manual alignment.

The reported experiments made use of two slightly different Background Reducing Internal Mask (BRIM) designs, which are here referred to as MK2 and MK3. The key features of the MK2 design were previously described.<sup>1</sup> The MK3 design is slightly different and offers superior performance, principally a reduction in background from the titanium at “low” scattering angles and a decrease in the extent to which scattering from the sample at “low” angles is blocked by the beam stop. Photographs of the two different BRIMs from various angles are shown in Sup. Fig. 1.

In the MK2 design, the hole parallel to the BRIM axis for the sample was located on axis and had a diameter of  $\sim 1.52$  mm. The BRIM tungsten body had a diameter of 6.32 mm, which provides a snug sliding fit inside the pressure vessel body. The x-ray beam entrance slit was  $\sim 0.3$  mm wide and,

at the bottom of this slit, there was a wide perpendicular slit that was used for initial x-ray alignment of the sample in the beam. The tungsten beam stop blade was 0.5 mm wide and 1 mm deep. The overall height of the BRIM body was 25.4 mm.

In the MK3 design, the hole parallel to the BRIM axis for the sample was located off axis so that it was further from the beam stop blade and closer to the x-ray entrance slit (hole axis off center by  $\sim 0.508$  mm). This reduces the extent to which the beam stop blade blocks scattering from the sample. The diameter of the hole for the sample was  $\sim 1.016$  mm, which further decreases the extent to which scattering from the sample is obscured by the beam stop blade but results in less overall signal. The BRIM body had a diameter of 6.22 mm, which provides a loose sliding fit in the grade 5 titanium pressure vessel bore. The loose fit relaxes the machining tolerances on the BRIM body and makes manufacture easier. Two coil springs were placed in slots around the circumference of the BRIM body so that the BRIM did not move in the bore of the pressure vessel after it was initially pushed into place. The x-ray beam entrance slit was  $\sim 0.2$  mm wide and, at the bottom of this slit, there was a large diameter round hole that was used for initial x-ray alignment of the sample in the beam. A hole was used rather than inverted “T”, as it is easier to machine. The rhenium beam stop blade was 0.5 mm wide and 1 mm deep. The overall height of the BRIM body was 19.05 mm.

| $T_{nominal}$ | $T_{sample, MK2BRIM}$ | $T_{sample, MK3BRIM}$ |
|---------------|-----------------------|-----------------------|
| 298K          | 298K                  | 298K                  |
| 343K          | 343K                  | 343K                  |
| 358K          | 357K                  | –                     |
| 373K          | 371K                  | –                     |
| 388K          | 386K                  | 386K                  |
| 403K          | 401K                  | –                     |
| 418K          | 416K                  | –                     |
| 433K          | 430K                  | 430K                  |
| 478K          | 473K                  | 473K                  |
| 523K          | 516K                  | 516K                  |

**Sup. Table 1** Results of temperature calibration of the MK2BRIM and MK3BRIM. A thermocouple was epoxied inside a capillary, which was subsequently inserted into one of the BRIMs. The high pressure environment was assembled as previously described.<sup>1</sup> Temperatures in the capillary ( $T_{sample}$ ) were recorded  $\sim 30$  min after the heating block reached the programmed temperature ( $T_{nominal}$ ). The maximum discrepancy between the nominal and measured sample temperatures was  $\sim 7$ K.

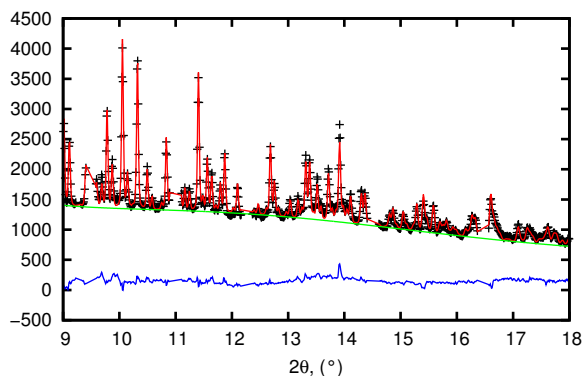

**Sup. Fig. 2** Rietveld fit (P<sub>2</sub>13 high temperature model) to ZrW<sub>2</sub>O<sub>8</sub> data collected at 430K and 276 MPa in the MK2BRIM. Data points are indicated by black crosses, fit by red line, background by green line, and difference curve by blue line. A few narrow 2θ intervals were excluded due to the presence of substantial parasitic titanium scattering from the pressure cell.

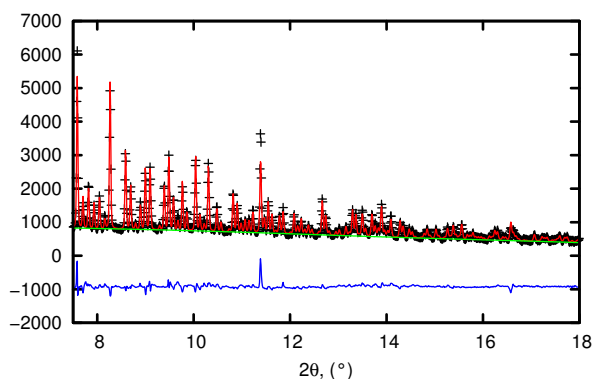

**Sup. Fig. 3** Rietveld fit (P<sub>2</sub>13 high temperature model) to ZrW<sub>2</sub>O<sub>8</sub> data collected at 386K and 103 MPa in the MK3BRIM. Data points are indicated by black crosses, fit by red line, background by green line, and difference curve by blue line. Use of the MK3BRIM allowed for Rietveld fitting down to a lower 2θ limit and fewer excluded regions as compared with the MK2BRIM due to its greater efficacy in reducing parasitic titanium scattering from the pressure cell. The two noticeable peaks in the difference curve are believed to be due to parasitic titanium scattering from the pressure cell; however, this contamination was much lower in this dataset than the MK2BRIM dataset in the same 2θ regions, so these regions were not excluded from Rietveld analysis.

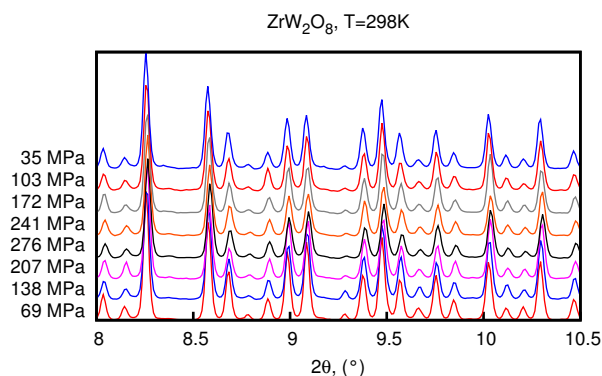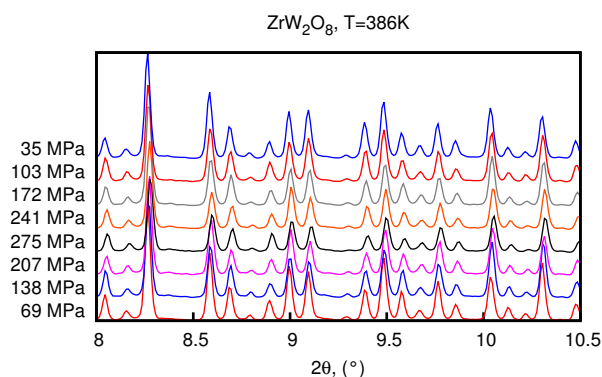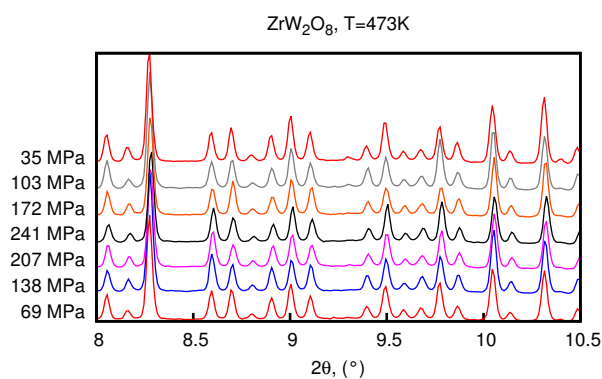

**Sup. Fig. 4** Integrated diffraction data from ZrW<sub>2</sub>O<sub>8</sub> experiment conducted in the MK3BRIM. Data are arranged in order of collection from bottom to top in each plot. Noticeable structural changes upon compression can be observed at 386K, particularly at the set of peaks just above 8.5°.

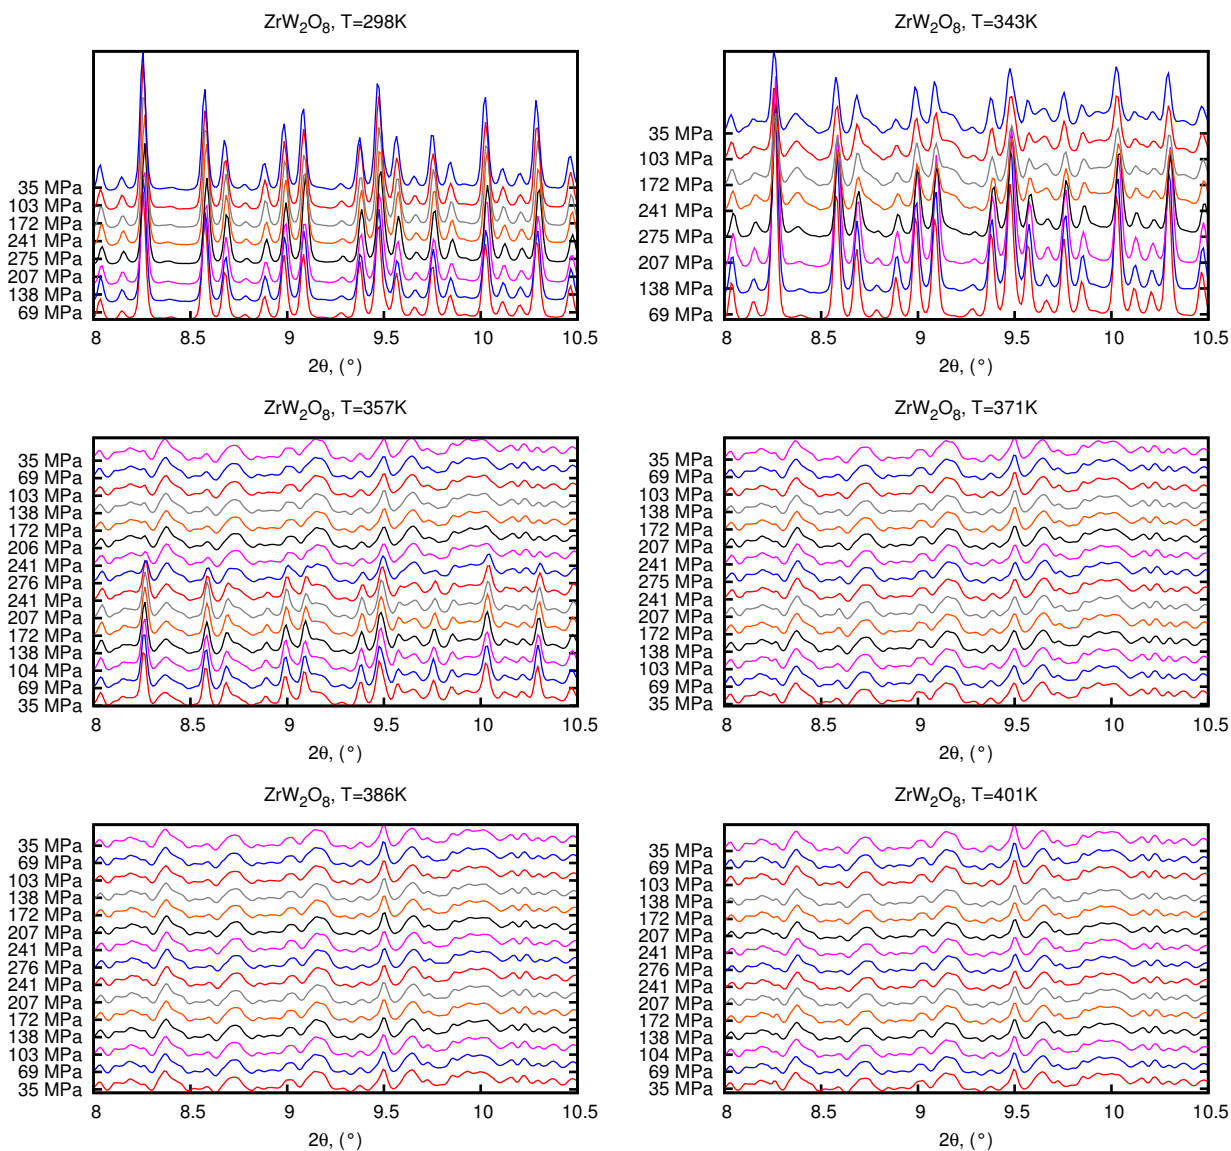

**Sup. Fig. 5** Integrated diffraction data from  $\text{ZrW}_2\text{O}_8$  experiment conducted in the MK2BRIM, 298-401K. Data are arranged in order of collection from bottom to top in each plot. The  $\alpha \rightarrow \gamma$  transition induced by compression can be visually tracked at 343K and 357K.

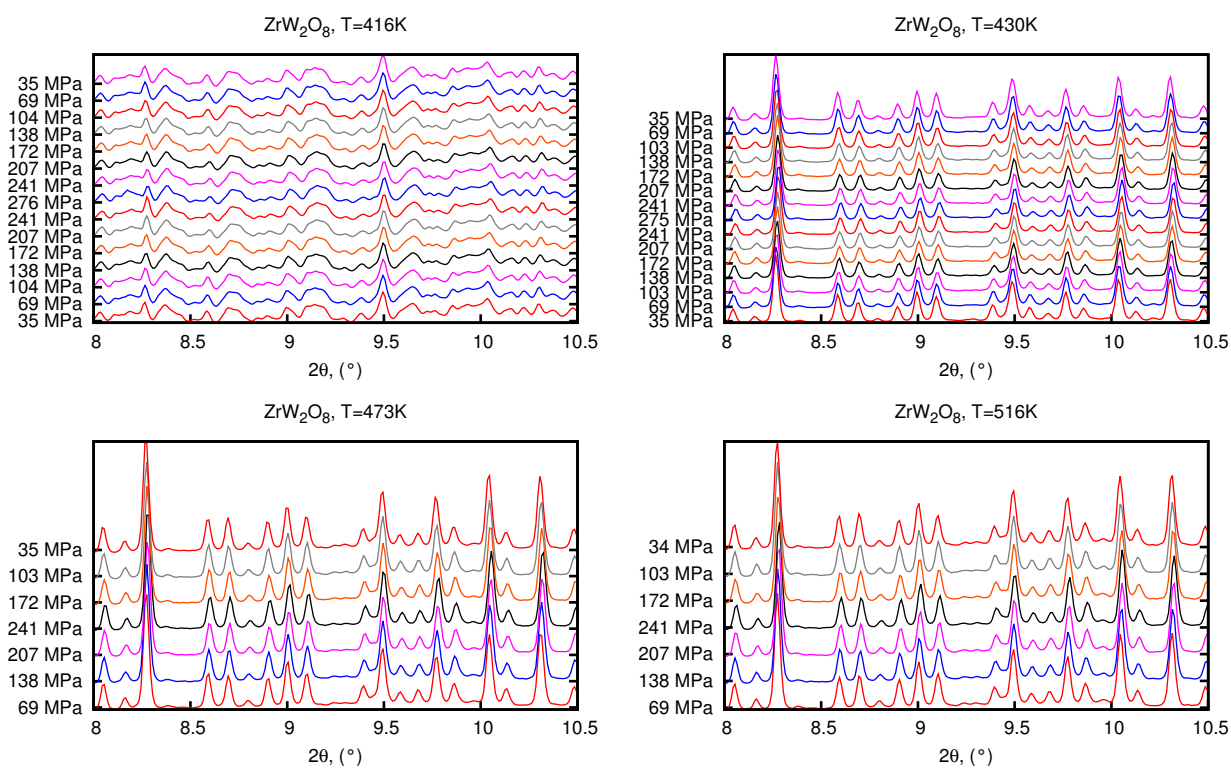

**Sup. Fig. 6** Integrated diffraction data from  $\text{ZrW}_2\text{O}_8$  experiment conducted in the MK2BRIM, 416-516K. Data are arranged in order of collection from bottom to top in each plot. Reversible pressure-dependent structural changes can be observed by inspection at 430K.

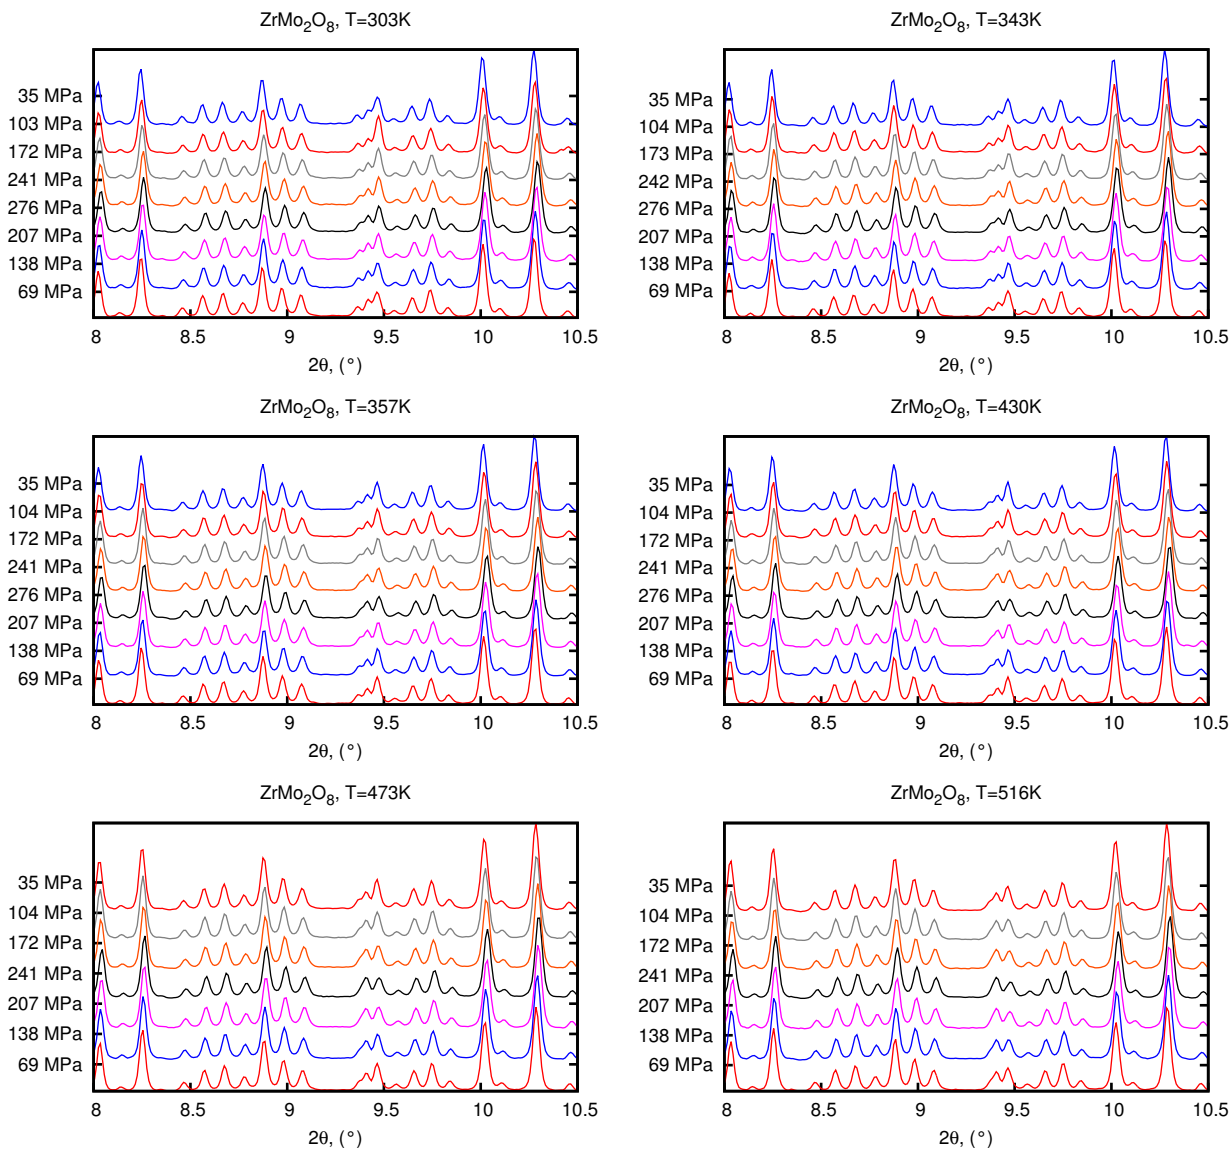

**Sup. Fig. 7** Integrated diffraction data from  $\text{ZrMo}_2\text{O}_8$  experiment conducted in the MK2BRIM. Data are arranged in order of collection from bottom to top in each plot. Absence of dramatic changes in structure upon heating or compression confirms the expected lack of a phase transition within the studied temperature and pressure ranges.

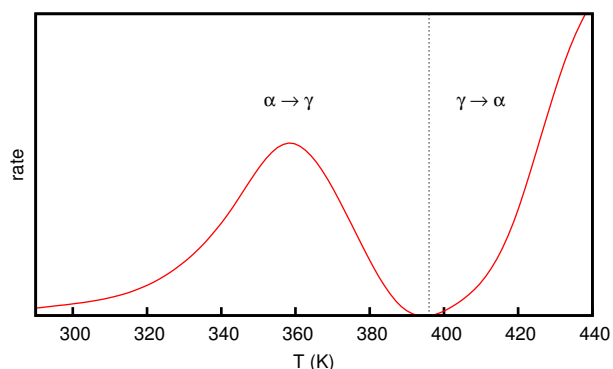

**Sup. Fig. 8** Schematic showing the temperature dependence of the  $\alpha \leftrightarrow \gamma$  transition rate for  $\text{ZrW}_2\text{O}_8$  at 276 MPa between room temperature and 430K. Proposed trends are based on the non-equilibrium phase diagram generated from the MK2BRIM experiment (Figure 2) and the absence of any  $\alpha \rightarrow \gamma$  transitions in the MK3BRIM experiment at 386K (Figure 3).

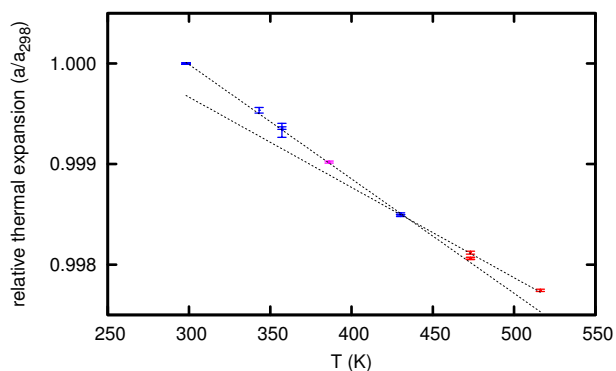

**Sup. Fig. 9** Relative linear thermal expansion ( $a/a_{298K}$ ) of  $\text{ZrW}_2\text{O}_8$  at 35 MPa. The  $\alpha$  phase is indicated by dark blue (MK2BRIM experiment) and pink (MK3BRIM experiment); the  $\beta$  phase is indicated by red symbols. The coefficient of thermal expansion calculated between room temperature and the  $\alpha \rightarrow \beta$  transition temperature (423K) agrees well with that calculated from lattice constants published in previous literature<sup>2</sup> ( $-11 \text{ ppm}\cdot\text{K}^{-1}$  vs  $-13 \text{ ppm}\cdot\text{K}^{-1}$ ), as does that calculated between 423K and 516K ( $-9 \text{ ppm}\cdot\text{K}^{-1}$  vs  $-8 \text{ ppm}\cdot\text{K}^{-1}$ ).

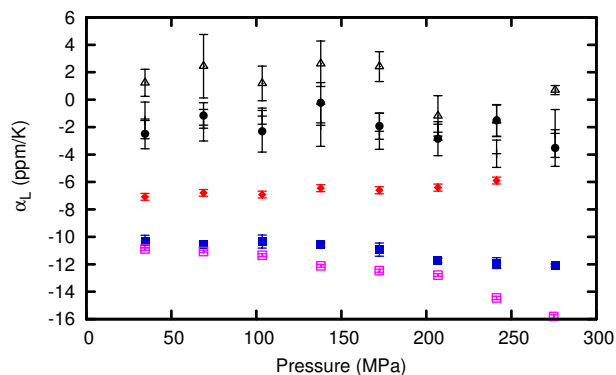

**Sup. Fig. 10** Coefficients of thermal expansion of  $\text{ZrW}_2\text{O}_8$ . The  $\alpha$  phase is denoted by either dark blue (MK2BRIM: 298K, 343K, and 357K) or pink (MK3BRIM: 298K and 386K) symbols; the  $\gamma$  phase (MK2BRIM: 357K, 371K, 386K, 401K, and 416K) is denoted by black symbols; the  $\beta$  phase (473K and 516K for  $\text{ZrW}_2\text{O}_8$ ) is denoted by red symbols. Of note is that the CTEs obtained for the  $\gamma$  phase are nowhere near as negative as the CTEs of the cubic phases. The results for the  $\gamma$  phase are sufficiently noisy that no clear pressure dependence can be observed in the CTE.

| Space group                                   | T    | $\kappa^a$ (GPa) | $\kappa^b$ (GPa) |
|-----------------------------------------------|------|------------------|------------------|
| P2 <sub>1</sub> 3                             | 298K | 64.2(10)         | 63.1(14)         |
| P2 <sub>1</sub> 3                             | 343K | 59.9(9)          | –                |
| P2 <sub>1</sub> 3                             | 357K | 59.0(8)          | –                |
| P2 <sub>1</sub> 2 <sub>1</sub> 2 <sub>1</sub> | 357K | 60.2(15)         | –                |
| P2 <sub>1</sub> 2 <sub>1</sub> 2 <sub>1</sub> | 371K | 61.4(8)          | –                |
| P2 <sub>1</sub> 2 <sub>1</sub> 2 <sub>1</sub> | 386K | 60.0(8)          | –                |
| P2 <sub>1</sub> 3                             | 386K | –                | 47.4(21)         |
| P2 <sub>1</sub> 2 <sub>1</sub> 2 <sub>1</sub> | 401K | 59.0(7)          | –                |
| P2 <sub>1</sub> 2 <sub>1</sub> 2 <sub>1</sub> | 416K | 57.0(6)          | –                |
| P2 <sub>1</sub> 3                             | 416K | 41.4(5)          | –                |
| P2 <sub>1</sub> 3(high T)                     | 430K | 45.5(4)          | –                |
| Pa $\bar{3}$                                  | 473K | 53.6(3)          | 54.0(11)         |
| Pa $\bar{3}$                                  | 516K | 55.5(2)          | –                |

**Sup. Table 2** Bulk moduli of  $\text{ZrW}_2\text{O}_8$  obtained from MK2BRIM<sup>a</sup> and MK3BRIM<sup>b</sup> experiments.

| Space group  | T    | $\kappa$ (GPa) |
|--------------|------|----------------|
| Pa $\bar{3}$ | 303K | 43.3(5)        |
| Pa $\bar{3}$ | 343K | 43.3(4)        |
| Pa $\bar{3}$ | 386K | 44.4(4)        |
| Pa $\bar{3}$ | 430K | 45.1(4)        |
| Pa $\bar{3}$ | 473K | 45.3(2)        |
| Pa $\bar{3}$ | 516K | 45.0(2)        |

**Sup. Table 3** Bulk moduli of  $\text{ZrMo}_2\text{O}_8$  obtained from MK2BRIM experiment.

Sup. Table 4: Lattice constants obtained from ZrW<sub>2</sub>O<sub>8</sub> MK2BRIM experiment, cubic models

| Space group               | T    | P (MPa) | a (Å)    | $\sigma_a$ | Volume (Å <sup>3</sup> ) | $\sigma_V$ |
|---------------------------|------|---------|----------|------------|--------------------------|------------|
| P2 <sub>1</sub> 3         | 298K | 35      | 9.115350 | 0.000067   | 757.391                  | 0.017      |
| P2 <sub>1</sub> 3         | 298K | 69      | 9.114000 | 0.000071   | 757.054                  | 0.018      |
| P2 <sub>1</sub> 3         | 298K | 103     | 9.111990 | 0.000060   | 756.553                  | 0.015      |
| P2 <sub>1</sub> 3         | 298K | 138     | 9.110690 | 0.000065   | 756.229                  | 0.016      |
| P2 <sub>1</sub> 3         | 298K | 172     | 9.108770 | 0.000062   | 755.752                  | 0.015      |
| P2 <sub>1</sub> 3         | 298K | 207     | 9.107460 | 0.000066   | 755.427                  | 0.016      |
| P2 <sub>1</sub> 3         | 298K | 241     | 9.105700 | 0.000067   | 754.987                  | 0.017      |
| P2 <sub>1</sub> 3         | 298K | 275     | 9.103940 | 0.000064   | 754.551                  | 0.016      |
| P2 <sub>1</sub> 3         | 343K | 35      | 9.111110 | 0.000254   | 756.334                  | 0.063      |
| P2 <sub>1</sub> 3         | 343K | 69      | 9.109670 | 0.000069   | 755.976                  | 0.017      |
| P2 <sub>1</sub> 3         | 343K | 103     | 9.107750 | 0.000270   | 755.497                  | 0.067      |
| P2 <sub>1</sub> 3         | 343K | 138     | 9.106350 | 0.000075   | 755.149                  | 0.019      |
| P2 <sub>1</sub> 3         | 343K | 172     | 9.104290 | 0.000272   | 754.637                  | 0.068      |
| P2 <sub>1</sub> 3         | 343K | 207     | 9.102660 | 0.000072   | 754.232                  | 0.018      |
| P2 <sub>1</sub> 3         | 343K | 241     | 9.100820 | 0.000219   | 753.774                  | 0.054      |
| P2 <sub>1</sub> 3         | 343K | 275     | 9.098990 | 0.000115   | 753.320                  | 0.029      |
| P2 <sub>1</sub> 3         | 357K | 35      | 9.109500 | 0.000112   | 755.933                  | 0.028      |
| P2 <sub>1</sub> 3         | 357K | 35      | 9.109290 | 0.000631   | 755.882                  | 0.157      |
| P2 <sub>1</sub> 3         | 357K | 69      | 9.107800 | 0.000121   | 755.511                  | 0.030      |
| P2 <sub>1</sub> 3         | 357K | 69      | 9.107770 | 0.000632   | 755.503                  | 0.157      |
| P2 <sub>1</sub> 3         | 357K | 104     | 9.106050 | 0.000129   | 755.076                  | 0.032      |
| P2 <sub>1</sub> 3         | 357K | 103     | 9.106320 | 0.000628   | 755.142                  | 0.156      |
| P2 <sub>1</sub> 3         | 357K | 138     | 9.104470 | 0.000122   | 754.683                  | 0.030      |
| P2 <sub>1</sub> 3         | 357K | 138     | 9.104490 | 0.000684   | 754.686                  | 0.170      |
| P2 <sub>1</sub> 3         | 357K | 172     | 9.102710 | 0.000123   | 754.244                  | 0.031      |
| P2 <sub>1</sub> 3         | 357K | 172     | 9.102460 | 0.000676   | 754.183                  | 0.168      |
| P2 <sub>1</sub> 3         | 357K | 207     | 9.100860 | 0.000139   | 753.784                  | 0.035      |
| P2 <sub>1</sub> 3         | 357K | 206     | 9.100980 | 0.000615   | 753.815                  | 0.153      |
| P2 <sub>1</sub> 3         | 357K | 241     | 9.098830 | 0.000151   | 753.280                  | 0.037      |
| P2 <sub>1</sub> 3         | 357K | 241     | 9.098840 | 0.000519   | 753.283                  | 0.129      |
| P2 <sub>1</sub> 3         | 357K | 276     | 9.096910 | 0.000258   | 752.804                  | 0.064      |
| P2 <sub>1</sub> 3(high T) | 298K | 35      | 9.115340 | 0.000064   | 757.389                  | 0.016      |
| P2 <sub>1</sub> 3(high T) | 298K | 69      | 9.113980 | 0.000069   | 757.050                  | 0.017      |
| P2 <sub>1</sub> 3(high T) | 298K | 103     | 9.111970 | 0.000059   | 756.550                  | 0.015      |
| P2 <sub>1</sub> 3(high T) | 298K | 138     | 9.110680 | 0.000064   | 756.226                  | 0.016      |
| P2 <sub>1</sub> 3(high T) | 298K | 172     | 9.108760 | 0.000059   | 755.748                  | 0.015      |
| P2 <sub>1</sub> 3(high T) | 298K | 207     | 9.107450 | 0.000064   | 755.424                  | 0.016      |
| P2 <sub>1</sub> 3(high T) | 298K | 241     | 9.105680 | 0.000065   | 754.984                  | 0.016      |
| P2 <sub>1</sub> 3(high T) | 298K | 275     | 9.103940 | 0.000064   | 754.550                  | 0.016      |
| P2 <sub>1</sub> 3(high T) | 430K | 35      | 9.101570 | 0.000087   | 753.962                  | 0.022      |
| P2 <sub>1</sub> 3(high T) | 430K | 35      | 9.101730 | 0.000089   | 754.001                  | 0.022      |
| P2 <sub>1</sub> 3(high T) | 430K | 69      | 9.099320 | 0.000089   | 753.403                  | 0.022      |
| P2 <sub>1</sub> 3(high T) | 430K | 69      | 9.099220 | 0.000092   | 753.377                  | 0.023      |
| P2 <sub>1</sub> 3(high T) | 430K | 103     | 9.096880 | 0.000094   | 752.795                  | 0.023      |
| P2 <sub>1</sub> 3(high T) | 430K | 103     | 9.096810 | 0.000097   | 752.780                  | 0.024      |
| P2 <sub>1</sub> 3(high T) | 430K | 138     | 9.094380 | 0.000100   | 752.175                  | 0.025      |
| P2 <sub>1</sub> 3(high T) | 430K | 138     | 9.094360 | 0.000099   | 752.170                  | 0.025      |
| P2 <sub>1</sub> 3(high T) | 430K | 172     | 9.092090 | 0.000105   | 751.608                  | 0.026      |
| P2 <sub>1</sub> 3(high T) | 430K | 172     | 9.092130 | 0.000101   | 751.618                  | 0.025      |

continued on next page



Sup. Table 4: Lattice constants obtained from ZrW<sub>2</sub>O<sub>8</sub> MK2BRIM experiment, cubic models—continued from previous page

| Space group               | T    | P (MPa) | a (Å)    | $\sigma_a$ | Volume (Å <sup>3</sup> ) | $\sigma_V$ |
|---------------------------|------|---------|----------|------------|--------------------------|------------|
| P2 <sub>1</sub> 3(high T) | 430K | 207     | 9.090040 | 0.000104   | 751.100                  | 0.026      |
| P2 <sub>1</sub> 3(high T) | 430K | 207     | 9.090030 | 0.000102   | 751.096                  | 0.025      |
| P2 <sub>1</sub> 3(high T) | 430K | 241     | 9.087780 | 0.000103   | 750.539                  | 0.026      |
| P2 <sub>1</sub> 3(high T) | 430K | 241     | 9.087830 | 0.000105   | 750.551                  | 0.026      |
| P2 <sub>1</sub> 3(high T) | 430K | 275     | 9.085650 | 0.000104   | 750.012                  | 0.026      |
| P2 <sub>1</sub> 3(high T) | 473K | 35      | 9.097680 | 0.000093   | 752.995                  | 0.023      |
| P2 <sub>1</sub> 3(high T) | 473K | 69      | 9.095800 | 0.000092   | 752.527                  | 0.023      |
| P2 <sub>1</sub> 3(high T) | 473K | 103     | 9.093900 | 0.000093   | 752.057                  | 0.023      |
| P2 <sub>1</sub> 3(high T) | 473K | 138     | 9.091870 | 0.000098   | 751.553                  | 0.024      |
| P2 <sub>1</sub> 3(high T) | 473K | 172     | 9.090020 | 0.000094   | 751.095                  | 0.023      |
| P2 <sub>1</sub> 3(high T) | 473K | 207     | 9.088020 | 0.000097   | 750.599                  | 0.024      |
| P2 <sub>1</sub> 3(high T) | 473K | 241     | 9.085970 | 0.000096   | 750.091                  | 0.024      |
| Pa $\bar{3}$              | 473K | 35      | 9.097690 | 0.000097   | 752.997                  | 0.024      |
| Pa $\bar{3}$              | 473K | 69      | 9.095800 | 0.000098   | 752.527                  | 0.024      |
| Pa $\bar{3}$              | 473K | 103     | 9.093910 | 0.000099   | 752.058                  | 0.024      |
| Pa $\bar{3}$              | 473K | 138     | 9.091870 | 0.000104   | 751.554                  | 0.026      |
| Pa $\bar{3}$              | 473K | 172     | 9.090020 | 0.000100   | 751.094                  | 0.025      |
| Pa $\bar{3}$              | 473K | 207     | 9.088020 | 0.000102   | 750.598                  | 0.025      |
| Pa $\bar{3}$              | 473K | 241     | 9.085970 | 0.000103   | 750.090                  | 0.026      |
| Pa $\bar{3}$              | 516K | 34      | 9.094790 | 0.000106   | 752.278                  | 0.026      |
| Pa $\bar{3}$              | 516K | 69      | 9.093020 | 0.000104   | 751.837                  | 0.026      |
| Pa $\bar{3}$              | 516K | 103     | 9.091080 | 0.000106   | 751.358                  | 0.026      |
| Pa $\bar{3}$              | 516K | 138     | 9.089230 | 0.000105   | 750.899                  | 0.026      |
| Pa $\bar{3}$              | 516K | 172     | 9.087320 | 0.000109   | 750.426                  | 0.027      |
| Pa $\bar{3}$              | 516K | 207     | 9.085400 | 0.000109   | 749.949                  | 0.027      |
| Pa $\bar{3}$              | 516K | 241     | 9.083560 | 0.000103   | 749.493                  | 0.026      |

Sup. Table 4 Lattice constants obtained from ZrW<sub>2</sub>O<sub>8</sub> MK2BRIM experiment. Cubic models were fit to data based on visual inspection of XRD patterns.

Sup. Table 5: Lattice constants obtained from ZrW<sub>2</sub>O<sub>8</sub> MK2BRIM experiment, P<sub>2</sub><sub>1</sub>2<sub>1</sub>2<sub>1</sub> model

| P <sub>2</sub> <sub>1</sub> 2 <sub>1</sub> 2 <sub>1</sub> | P (MPa) | a (Å)    | $\sigma_a$ | b (Å)     | $\sigma_b$ | c (Å)    | $\sigma_c$ | Volume (Å <sup>3</sup> ) | $\sigma_V$ |
|-----------------------------------------------------------|---------|----------|------------|-----------|------------|----------|------------|--------------------------|------------|
| 357K                                                      | 35      | 9.033827 | 0.001105   | 26.928738 | 0.003072   | 8.880258 | 0.001125   | 2160.296                 | 0.350      |
| 357K                                                      | 35      | 9.033233 | 0.000671   | 26.919950 | 0.001850   | 8.880396 | 0.000681   | 2159.483                 | 0.209      |
| 357K                                                      | 69      | 9.029486 | 0.001172   | 26.923830 | 0.003265   | 8.878078 | 0.001197   | 2158.335                 | 0.373      |
| 357K                                                      | 69      | 9.031701 | 0.000656   | 26.914082 | 0.001811   | 8.879092 | 0.000666   | 2158.329                 | 0.204      |
| 357K                                                      | 104     | 9.029593 | 0.001146   | 26.916063 | 0.003183   | 8.875854 | 0.001170   | 2157.197                 | 0.362      |
| 357K                                                      | 103     | 9.029926 | 0.000662   | 26.909615 | 0.001821   | 8.876754 | 0.000672   | 2156.979                 | 0.206      |
| 357K                                                      | 138     | 9.027816 | 0.001043   | 26.911335 | 0.002898   | 8.876217 | 0.001065   | 2156.482                 | 0.328      |
| 357K                                                      | 138     | 9.027968 | 0.000690   | 26.905754 | 0.001897   | 8.875230 | 0.000700   | 2155.832                 | 0.215      |
| 357K                                                      | 172     | 9.025635 | 0.000995   | 26.905800 | 0.002755   | 8.873708 | 0.001014   | 2154.908                 | 0.313      |
| 357K                                                      | 172     | 9.026060 | 0.000673   | 26.899986 | 0.001847   | 8.873649 | 0.000682   | 2154.530                 | 0.209      |
| 357K                                                      | 207     | 9.024323 | 0.000969   | 26.899780 | 0.002666   | 8.870747 | 0.000984   | 2153.394                 | 0.304      |
| 357K                                                      | 206     | 9.024935 | 0.000679   | 26.895552 | 0.001859   | 8.872137 | 0.000688   | 2153.539                 | 0.211      |
| 357K                                                      | 241     | 9.022320 | 0.000862   | 26.892941 | 0.002367   | 8.870162 | 0.000877   | 2152.227                 | 0.269      |
| 357K                                                      | 241     | 9.022868 | 0.000705   | 26.891285 | 0.001935   | 8.871198 | 0.000716   | 2152.477                 | 0.219      |
| 357K                                                      | 276     | 9.021348 | 0.000735   | 26.886475 | 0.002013   | 8.868859 | 0.000746   | 2151.162                 | 0.228      |
| 371K                                                      | 35      | 9.035396 | 0.000864   | 26.913536 | 0.002399   | 8.880079 | 0.000877   | 2159.408                 | 0.267      |
| 371K                                                      | 35      | 9.034789 | 0.000807   | 26.913685 | 0.002230   | 8.879290 | 0.000820   | 2159.083                 | 0.250      |

continued on next page

Sup. Table 5: Lattice constants obtained from ZrW<sub>2</sub>O<sub>8</sub> MK2BRIM experiment, P<sub>2</sub>1<sub>2</sub>1<sub>2</sub>1 model—continued from previous page

| P <sub>2</sub> 1 <sub>2</sub> 1 <sub>2</sub> 1 | P (MPa) | a (Å)    | $\sigma_a$ | b (Å)     | $\sigma_b$ | c (Å)    | $\sigma_c$ | Volume (Å <sup>3</sup> ) | $\sigma_V$ |
|------------------------------------------------|---------|----------|------------|-----------|------------|----------|------------|--------------------------|------------|
| 371K                                           | 69      | 9.033370 | 0.000848   | 26.907995 | 0.002353   | 8.878286 | 0.000862   | 2158.044                 | 0.262      |
| 371K                                           | 69      | 9.032562 | 0.000798   | 26.909218 | 0.002197   | 8.877742 | 0.000812   | 2157.817                 | 0.247      |
| 371K                                           | 103     | 9.031170 | 0.000852   | 26.904013 | 0.002355   | 8.876626 | 0.000867   | 2156.795                 | 0.263      |
| 371K                                           | 103     | 9.030974 | 0.000809   | 26.903774 | 0.002226   | 8.876452 | 0.000825   | 2156.688                 | 0.251      |
| 371K                                           | 138     | 9.029393 | 0.000829   | 26.898870 | 0.002281   | 8.874425 | 0.000844   | 2155.425                 | 0.256      |
| 371K                                           | 138     | 9.029380 | 0.000807   | 26.896675 | 0.002225   | 8.874760 | 0.000821   | 2155.327                 | 0.248      |
| 371K                                           | 172     | 9.027959 | 0.000840   | 26.893549 | 0.002315   | 8.873411 | 0.000855   | 2154.410                 | 0.259      |
| 371K                                           | 172     | 9.027145 | 0.000811   | 26.892899 | 0.002228   | 8.873269 | 0.000825   | 2154.129                 | 0.250      |
| 371K                                           | 207     | 9.025835 | 0.000848   | 26.888582 | 0.002330   | 8.871732 | 0.000861   | 2153.097                 | 0.261      |
| 371K                                           | 207     | 9.025710 | 0.000784   | 26.890322 | 0.002147   | 8.871824 | 0.000796   | 2153.229                 | 0.242      |
| 371K                                           | 241     | 9.024328 | 0.000839   | 26.885792 | 0.002298   | 8.869975 | 0.000851   | 2152.089                 | 0.259      |
| 371K                                           | 241     | 9.024035 | 0.000806   | 26.884281 | 0.002203   | 8.869631 | 0.000819   | 2151.814                 | 0.248      |
| 371K                                           | 275     | 9.022168 | 0.000782   | 26.880384 | 0.002134   | 8.868306 | 0.000792   | 2150.736                 | 0.241      |
| 386K                                           | 35      | 9.034976 | 0.000822   | 26.914341 | 0.002273   | 8.879451 | 0.000835   | 2159.220                 | 0.254      |
| 386K                                           | 35      | 9.034276 | 0.000789   | 26.912695 | 0.002185   | 8.879498 | 0.000803   | 2158.932                 | 0.244      |
| 386K                                           | 69      | 9.032907 | 0.000819   | 26.910742 | 0.002258   | 8.877645 | 0.000832   | 2157.998                 | 0.254      |
| 386K                                           | 69      | 9.032710 | 0.000795   | 26.906971 | 0.002200   | 8.877633 | 0.000810   | 2157.645                 | 0.245      |
| 386K                                           | 103     | 9.031017 | 0.000789   | 26.902679 | 0.002168   | 8.875833 | 0.000804   | 2156.460                 | 0.244      |
| 386K                                           | 103     | 9.030811 | 0.000851   | 26.903334 | 0.002342   | 8.875420 | 0.000866   | 2156.362                 | 0.263      |
| 386K                                           | 138     | 9.029686 | 0.000789   | 26.898991 | 0.002163   | 8.873751 | 0.000802   | 2155.340                 | 0.244      |
| 386K                                           | 138     | 9.028517 | 0.000800   | 26.898090 | 0.002197   | 8.874248 | 0.000814   | 2155.110                 | 0.247      |
| 386K                                           | 172     | 9.027388 | 0.000783   | 26.895826 | 0.002146   | 8.872721 | 0.000795   | 2154.288                 | 0.242      |
| 386K                                           | 172     | 9.027098 | 0.000780   | 26.893660 | 0.002133   | 8.872595 | 0.000794   | 2154.015                 | 0.241      |
| 386K                                           | 206     | 9.025457 | 0.000785   | 26.890154 | 0.002154   | 8.870955 | 0.000796   | 2152.945                 | 0.242      |
| 386K                                           | 207     | 9.025181 | 0.000809   | 26.889709 | 0.002216   | 8.870761 | 0.000821   | 2152.796                 | 0.250      |
| 386K                                           | 241     | 9.023182 | 0.000748   | 26.885357 | 0.002041   | 8.869300 | 0.000760   | 2151.617                 | 0.231      |
| 386K                                           | 241     | 9.023390 | 0.000776   | 26.884369 | 0.002115   | 8.869005 | 0.000787   | 2151.515                 | 0.239      |
| 386K                                           | 275     | 9.021426 | 0.000751   | 26.880436 | 0.002041   | 8.867529 | 0.000761   | 2150.375                 | 0.232      |
| 401K                                           | 35      | 9.034640 | 0.000775   | 26.915199 | 0.002137   | 8.878999 | 0.000787   | 2159.099                 | 0.240      |
| 401K                                           | 35      | 9.034725 | 0.000777   | 26.914009 | 0.002142   | 8.879044 | 0.000789   | 2159.034                 | 0.240      |
| 401K                                           | 69      | 9.032587 | 0.000761   | 26.912212 | 0.002099   | 8.877579 | 0.000773   | 2158.023                 | 0.236      |
| 401K                                           | 69      | 9.032337 | 0.000743   | 26.908945 | 0.002047   | 8.877836 | 0.000756   | 2157.764                 | 0.230      |
| 401K                                           | 103     | 9.030922 | 0.000763   | 26.905695 | 0.002105   | 8.876101 | 0.000774   | 2156.744                 | 0.235      |
| 401K                                           | 103     | 9.030573 | 0.000781   | 26.904005 | 0.002148   | 8.875749 | 0.000795   | 2156.439                 | 0.241      |
| 401K                                           | 138     | 9.028810 | 0.000777   | 26.901340 | 0.002123   | 8.874467 | 0.000791   | 2155.493                 | 0.241      |
| 401K                                           | 138     | 9.028955 | 0.000788   | 26.898432 | 0.002166   | 8.874598 | 0.000802   | 2155.327                 | 0.243      |
| 401K                                           | 172     | 9.027188 | 0.000758   | 26.895430 | 0.002077   | 8.872859 | 0.000769   | 2154.242                 | 0.234      |
| 401K                                           | 172     | 9.026670 | 0.000783   | 26.894907 | 0.002145   | 8.872795 | 0.000796   | 2154.061                 | 0.242      |
| 401K                                           | 207     | 9.025253 | 0.000765   | 26.889690 | 0.002083   | 8.870920 | 0.000777   | 2152.851                 | 0.236      |
| 401K                                           | 207     | 9.025010 | 0.000809   | 26.887310 | 0.002208   | 8.871122 | 0.000822   | 2152.651                 | 0.249      |
| 401K                                           | 241     | 9.023277 | 0.000750   | 26.884680 | 0.002042   | 8.869348 | 0.000760   | 2151.596                 | 0.231      |
| 401K                                           | 241     | 9.022954 | 0.000767   | 26.882910 | 0.002089   | 8.869455 | 0.000777   | 2151.404                 | 0.236      |
| 401K                                           | 276     | 9.021502 | 0.000744   | 26.880951 | 0.002020   | 8.867369 | 0.000754   | 2150.395                 | 0.230      |
| 416K                                           | 35      | 9.037423 | 0.001540   | 26.908182 | 0.004323   | 8.878519 | 0.001550   | 2159.084                 | 0.472      |
| 416K                                           | 35      | 9.037197 | 0.001538   | 26.906170 | 0.004316   | 8.878809 | 0.001550   | 2158.939                 | 0.470      |
| 416K                                           | 69      | 9.034838 | 0.001545   | 26.904308 | 0.004322   | 8.876683 | 0.001558   | 2157.709                 | 0.474      |
| 416K                                           | 69      | 9.034980 | 0.001508   | 26.901140 | 0.004227   | 8.877053 | 0.001522   | 2157.579                 | 0.461      |
| 416K                                           | 103     | 9.032659 | 0.001512   | 26.898544 | 0.004227   | 8.874970 | 0.001525   | 2156.311                 | 0.463      |
| 416K                                           | 104     | 9.032656 | 0.001493   | 26.895969 | 0.004178   | 8.875211 | 0.001509   | 2156.162                 | 0.456      |

continued on next page

Sup. Table 5: Lattice constants obtained from ZrW<sub>2</sub>O<sub>8</sub> MK2BRIM experiment, P<sub>2</sub>1<sub>2</sub>1<sub>2</sub>1 model—continued from previous page

| P <sub>2</sub> 1 <sub>2</sub> 1 <sub>2</sub> 1 | P (MPa) | a (Å)    | $\sigma_a$ | b (Å)     | $\sigma_b$ | c (Å)    | $\sigma_c$ | Volume (Å <sup>3</sup> ) | $\sigma_V$ |
|------------------------------------------------|---------|----------|------------|-----------|------------|----------|------------|--------------------------|------------|
| 416K                                           | 138     | 9.030670 | 0.001417   | 26.894419 | 0.003956   | 8.873328 | 0.001429   | 2155.106                 | 0.434      |
| 416K                                           | 138     | 9.030410 | 0.001472   | 26.891533 | 0.004112   | 8.873560 | 0.001488   | 2154.869                 | 0.450      |
| 416K                                           | 172     | 9.028961 | 0.001429   | 26.891043 | 0.003972   | 8.871239 | 0.001441   | 2153.921                 | 0.438      |
| 416K                                           | 172     | 9.028088 | 0.001410   | 26.887859 | 0.003927   | 8.871840 | 0.001425   | 2153.603                 | 0.431      |
| 416K                                           | 207     | 9.026505 | 0.001406   | 26.884062 | 0.003898   | 8.869687 | 0.001417   | 2152.399                 | 0.430      |
| 416K                                           | 207     | 9.026462 | 0.001379   | 26.884754 | 0.003826   | 8.869377 | 0.001391   | 2152.369                 | 0.423      |
| 416K                                           | 241     | 9.024359 | 0.001404   | 26.881804 | 0.003873   | 8.867377 | 0.001413   | 2151.146                 | 0.432      |
| 416K                                           | 241     | 9.024806 | 0.001384   | 26.880577 | 0.003822   | 8.867337 | 0.001393   | 2151.145                 | 0.424      |
| 416K                                           | 276     | 9.022848 | 0.001367   | 26.874067 | 0.003772   | 8.866192 | 0.001374   | 2149.880                 | 0.418      |

**Sup. Table 5** Lattice constants obtained from ZrW<sub>2</sub>O<sub>8</sub> MK2BRIM experiment. A P<sub>2</sub>1<sub>2</sub>1<sub>2</sub>1 model was fit to the data for XRD patterns where it was evident by visual inspection that the  $\alpha \rightarrow \gamma$  transition had occurred.

Sup. Table 6: Lattice constants obtained from ZrW<sub>2</sub>O<sub>8</sub> MK3BRIM experiment, cubic models

| Space group                            | T    | P (MPa) | a (Å)    | $\sigma_a$ | Volume (Å <sup>3</sup> ) | $\sigma_V$ |
|----------------------------------------|------|---------|----------|------------|--------------------------|------------|
| P <sub>2</sub> 1 <sub>3</sub>          | 298K | 69      | 9.109929 | 0.000071   | 756.040                  | 0.018      |
| P <sub>2</sub> 1 <sub>3</sub>          | 298K | 138     | 9.106708 | 0.000070   | 755.239                  | 0.019      |
| P <sub>2</sub> 1 <sub>3</sub>          | 298K | 207     | 9.103127 | 0.000064   | 754.348                  | 0.016      |
| P <sub>2</sub> 1 <sub>3</sub>          | 298K | 276     | 9.099586 | 0.000077   | 753.468                  | 0.019      |
| P <sub>2</sub> 1 <sub>3</sub>          | 298K | 241     | 9.101390 | 0.000077   | 753.916                  | 0.019      |
| P <sub>2</sub> 1 <sub>3</sub>          | 298K | 172     | 9.104658 | 0.000070   | 754.729                  | 0.017      |
| P <sub>2</sub> 1 <sub>3</sub>          | 298K | 103     | 9.107805 | 0.000071   | 755.512                  | 0.018      |
| P <sub>2</sub> 1 <sub>3</sub>          | 298K | 35      | 9.111081 | 0.000067   | 756.327                  | 0.017      |
| P <sub>2</sub> 1 <sub>3</sub>          | 386K | 69      | 9.100857 | 0.000081   | 753.784                  | 0.020      |
| P <sub>2</sub> 1 <sub>3</sub>          | 386K | 138     | 9.096786 | 0.000100   | 752.773                  | 0.025      |
| P <sub>2</sub> 1 <sub>3</sub>          | 386K | 207     | 9.092655 | 0.000102   | 751.748                  | 0.029      |
| P <sub>2</sub> 1 <sub>3</sub>          | 386K | 275     | 9.086649 | 0.000127   | 750.259                  | 0.031      |
| P <sub>2</sub> 1 <sub>3</sub>          | 386K | 241     | 9.089556 | 0.000115   | 750.979                  | 0.029      |
| P <sub>2</sub> 1 <sub>3</sub>          | 386K | 172     | 9.094449 | 0.000113   | 752.193                  | 0.028      |
| P <sub>2</sub> 1 <sub>3</sub>          | 386K | 103     | 9.098512 | 0.000098   | 753.201                  | 0.024      |
| P <sub>2</sub> 1 <sub>3</sub>          | 386K | 35      | 9.102155 | 0.000089   | 754.106                  | 0.022      |
| Pa $\bar{3}$                           | 473K | 69      | 9.091865 | 0.000092   | 751.552                  | 0.023      |
| Pa $\bar{3}$                           | 473K | 138     | 9.087873 | 0.000110   | 750.562                  | 0.027      |
| Pa $\bar{3}$                           | 473K | 207     | 9.084460 | 0.000130   | 749.717                  | 0.032      |
| Pa $\bar{3}$                           | 473K | 241     | 9.082028 | 0.000116   | 749.115                  | 0.029      |
| Pa $\bar{3}$                           | 473K | 172     | 9.086291 | 0.000122   | 750.170                  | 0.030      |
| Pa $\bar{3}$                           | 473K | 103     | 9.089894 | 0.000101   | 751.063                  | 0.025      |
| Pa $\bar{3}$                           | 473K | 35      | 9.093941 | 0.000136   | 752.067                  | 0.034      |
| P <sub>2</sub> 1 <sub>3</sub> (high T) | 386K | 69      | 9.100851 | 0.000073   | 753.782                  | 0.018      |
| P <sub>2</sub> 1 <sub>3</sub> (high T) | 386K | 138     | 9.096766 | 0.000075   | 752.768                  | 0.019      |
| P <sub>2</sub> 1 <sub>3</sub> (high T) | 386K | 207     | 9.092649 | 0.000089   | 751.746                  | 0.022      |
| P <sub>2</sub> 1 <sub>3</sub> (high T) | 386K | 275     | 9.086608 | 0.000092   | 750.249                  | 0.023      |
| P <sub>2</sub> 1 <sub>3</sub> (high T) | 386K | 241     | 9.089545 | 0.000090   | 750.977                  | 0.022      |
| P <sub>2</sub> 1 <sub>3</sub> (high T) | 386K | 172     | 9.094435 | 0.000084   | 752.189                  | 0.021      |
| P <sub>2</sub> 1 <sub>3</sub> (high T) | 386K | 103     | 9.098514 | 0.000084   | 753.202                  | 0.021      |
| P <sub>2</sub> 1 <sub>3</sub> (high T) | 386K | 35      | 9.102149 | 0.000088   | 754.105                  | 0.022      |

**Sup. Table 6** Lattice constants obtained from ZrW<sub>2</sub>O<sub>8</sub> MK3BRIM experiment. Cubic models were fit to data based on visual inspection of XRD patterns.

Sup. Table 7: Lattice constants obtained from ZrMo<sub>2</sub>O<sub>8</sub> MK2BRIM experiment, Pa $\bar{3}$  model

| Pa $\bar{3}$ | P (MPa) | a (Å)    | $\sigma_a$ | Volume (Å <sup>3</sup> ) | $\sigma_V$ |
|--------------|---------|----------|------------|--------------------------|------------|
| 303K         | 1       | 9.129006 | 0.000117   | 760.800                  | 0.029      |
| 303K         | 69      | 9.124648 | 0.000121   | 759.711                  | 0.030      |
| 303K         | 138     | 9.119946 | 0.000128   | 758.537                  | 0.032      |
| 303K         | 207     | 9.114957 | 0.000133   | 757.293                  | 0.033      |
| 303K         | 35      | 9.126906 | 0.000140   | 760.275                  | 0.035      |
| 303K         | 276     | 9.109618 | 0.000140   | 755.963                  | 0.035      |
| 303K         | 241     | 9.112365 | 0.000143   | 756.647                  | 0.036      |
| 303K         | 172     | 9.117344 | 0.000148   | 757.888                  | 0.037      |
| 303K         | 103     | 9.122045 | 0.000160   | 759.061                  | 0.040      |
| 343K         | 35      | 9.125693 | 0.000139   | 759.972                  | 0.035      |
| 343K         | 69      | 9.123399 | 0.000133   | 759.399                  | 0.033      |
| 343K         | 104     | 9.121072 | 0.000140   | 758.818                  | 0.035      |
| 343K         | 138     | 9.118667 | 0.000135   | 758.218                  | 0.034      |
| 343K         | 173     | 9.116313 | 0.000139   | 757.631                  | 0.035      |
| 343K         | 207     | 9.113846 | 0.000137   | 757.016                  | 0.034      |
| 343K         | 242     | 9.111281 | 0.000135   | 756.377                  | 0.034      |
| 343K         | 276     | 9.108767 | 0.000138   | 755.751                  | 0.034      |
| 386K         | 35      | 9.123287 | 0.000145   | 759.371                  | 0.036      |
| 386K         | 69      | 9.121164 | 0.000139   | 758.841                  | 0.035      |
| 386K         | 104     | 9.118836 | 0.000145   | 758.260                  | 0.036      |
| 386K         | 138     | 9.116542 | 0.000144   | 757.688                  | 0.036      |
| 386K         | 172     | 9.114147 | 0.000144   | 757.091                  | 0.036      |
| 386K         | 207     | 9.111759 | 0.000146   | 756.496                  | 0.036      |
| 386K         | 241     | 9.109289 | 0.000146   | 755.881                  | 0.036      |
| 386K         | 276     | 9.106862 | 0.000149   | 755.277                  | 0.037      |
| 430K         | 35      | 9.120367 | 0.000153   | 758.642                  | 0.038      |
| 430K         | 69      | 9.118298 | 0.000150   | 758.126                  | 0.037      |
| 430K         | 104     | 9.115992 | 0.000147   | 757.551                  | 0.037      |
| 430K         | 138     | 9.113698 | 0.000147   | 756.979                  | 0.037      |
| 430K         | 172     | 9.111425 | 0.000145   | 756.413                  | 0.036      |
| 430K         | 207     | 9.108988 | 0.000150   | 755.806                  | 0.037      |
| 430K         | 241     | 9.106637 | 0.000147   | 755.221                  | 0.037      |
| 430K         | 276     | 9.104217 | 0.000150   | 754.619                  | 0.037      |
| 473K         | 35      | 9.118218 | 0.000149   | 758.106                  | 0.037      |
| 473K         | 69      | 9.116005 | 0.000151   | 757.554                  | 0.038      |
| 473K         | 104     | 9.113730 | 0.000146   | 756.987                  | 0.036      |
| 473K         | 138     | 9.111430 | 0.000147   | 756.414                  | 0.037      |
| 473K         | 172     | 9.109104 | 0.000145   | 755.835                  | 0.036      |
| 473K         | 207     | 9.106725 | 0.000151   | 755.243                  | 0.038      |
| 473K         | 241     | 9.104398 | 0.000150   | 754.664                  | 0.037      |
| 516K         | 35      | 9.116366 | 0.000146   | 757.644                  | 0.036      |
| 516K         | 69      | 9.114191 | 0.000147   | 757.102                  | 0.037      |
| 516K         | 104     | 9.111843 | 0.000148   | 756.517                  | 0.037      |
| 516K         | 138     | 9.109546 | 0.000149   | 755.945                  | 0.037      |
| 516K         | 172     | 9.107220 | 0.000152   | 755.366                  | 0.038      |
| 516K         | 207     | 9.104828 | 0.000150   | 754.771                  | 0.037      |
| 516K         | 241     | 9.102471 | 0.000150   | 754.185                  | 0.037      |

**Sup. Table 7** Lattice constants obtained from ZrMo<sub>2</sub>O<sub>8</sub> experiment. Cubic models were fit to data based on visual inspection of XRD patterns.

## References

- 1 A. P. Wilkinson, C. R. Morelock, B. K. Greve, A. C. Jupe, K. W. Chapman, P. J. Chupas and C. Kurtz, *J. Appl. Crystallogr.*, 2011, **44**, 1047–1053.
- 2 J. S. O. Evans, T. A. Mary, T. Vogt, M. A. Subramanian and A. W. Sleight, *Chem. Mater.*, 1996, **8**, 2809–2823.
